# Supplementary material
Source: ML conference proceedings conference paper supplement (https://openaccess.thecvf.com/content/CVPR2026/html/Du_UAVLight_A_Benchmark_CVPR_2026_paper.html)
Supplement: Supplementary file 1 [file CVPR2026_UAVLight_ss.pdf › CVPR2026_UAVLight_ss.pdf]

# UAVLight: A Benchmark for Illumination-Robust 3D Reconstruction in Unmanned Aerial Vehicle (UAV) Scenes

## Supplementary Material

### Overview

This supplementary material provides additional qualitative and quantitative results complementing the UAVLight benchmark paper. It is organized into four parts, and we also provide a video file containing extended visualizations across time slots and viewpoints.

- **Part 1: Additional Dense Point Cloud Visualizations.**

We provide dense point cloud renderings for the remaining six scenes not shown in the main paper, illustrating large-scale geometry and illumination-sensitive regions (Fig. 2).

- **Part 2: Multi-Time-Slot Visualizations Across All Scenes.** Figs. 3 and 4 show 3–5 representative time slots per scene, demonstrating how natural sunlight variations affect appearance while geometry and viewpoints remain fixed.

- **Part 3: Additional Baseline Comparisons.** We provide qualitative comparisons of all evaluated baselines on the remaining six scenes, as shown in Figure 5. These examples extend the main paper’s analysis of explicit versus implicit illumination modeling.

- **Part 4: Extended Quantitative Results.** We report full PSNR, SSIM, and LPIPS results for the remaining six scenes, complementing Tables 4 and 5 in the main paper. The metrics are presented in two tables, each covering three scenes (Road2, Industrial, Roof in Table 1; City2, Industrial2, City in Table 2). These results complete the evaluation over all 18 UAVLight scenes and further demonstrate the benchmark’s illumination diversity and consistency across time.

These additions offer a complete view of UAVLight’s behavior across all 18 scenes and multi-time-of-day captures, further supporting its role as a controlled-yet-natural benchmark for illumination-robust reconstruction.

### Reproducibility Details

To ensure full reproducibility, we provide the following implementation and configuration details used across all experiments:

- **Hardware.** NVIDIA A800 GPUs, 80GB VRAM for all baseline methods.
- **Software.** PyTorch 2.4.1, CUDA 11.8, COLMAP 3.7.
- **Dataset Release.** We release camera poses, A/B split indices per time slot, undistorted images, sunlight vectors, dense pointcloud, and evaluation scripts.

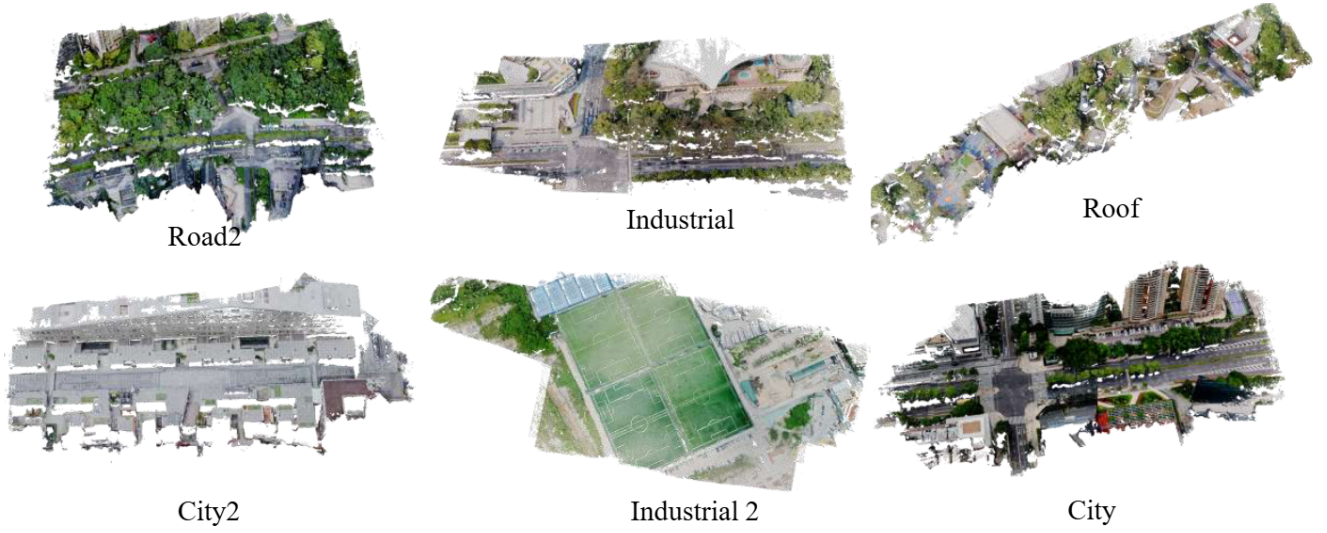

Figure 2. **Dense point cloud visualizations for the remaining six scenes in UAVLight.** These reconstructions exhibit diverse structural layouts, including vegetation, metallic structures, and transportation infrastructure, serving as ground-truth geometric references under changing natural illumination.

| Method               | Road2 |       |       | Industrial |       |       | Roof  |       |       |
|----------------------|-------|-------|-------|------------|-------|-------|-------|-------|-------|
|                      | PSNR  | SSIM  | LPIPS | PSNR       | SSIM  | LPIPS | PSNR  | SSIM  | LPIPS |
| <b>LumiGauss</b>     | 22.24 | 0.750 | 0.163 | 17.42      | 0.676 | 0.223 | 19.79 | 0.654 | 0.288 |
| <b>WildGaussians</b> | 21.60 | 0.692 | 0.223 | 17.49      | 0.580 | 0.338 | 16.91 | 0.532 | 0.555 |
| <b>GaussianWild</b>  | 21.34 | 0.721 | 0.170 | 18.13      | 0.622 | 0.285 | 19.29 | 0.587 | 0.394 |
| <b>NeRF-OSR</b>      | 16.53 | 0.369 | 0.581 | 18.85      | 0.513 | 0.555 | 18.17 | 0.462 | 0.691 |
| <b>NeRF-W</b>        | 16.93 | 0.431 | 0.493 | 16.45      | 0.534 | 0.481 | 18.18 | 0.516 | 0.504 |

Table 1. **Extended quantitative results (Part 1)** on Road2, Industrial, and Roof. Metrics are reported separately for PSNR, SSIM, and LPIPS (no slash).

| Method               | City2 |       |       | Industrial2 |       |       | City  |       |       |
|----------------------|-------|-------|-------|-------------|-------|-------|-------|-------|-------|
|                      | PSNR  | SSIM  | LPIPS | PSNR        | SSIM  | LPIPS | PSNR  | SSIM  | LPIPS |
| <b>LumiGauss</b>     | 22.69 | 0.820 | 0.148 | 20.03       | 0.850 | 0.188 | 19.77 | 0.780 | 0.155 |
| <b>WildGaussians</b> | 21.21 | 0.759 | 0.215 | 24.80       | 0.909 | 0.121 | 20.82 | 0.749 | 0.180 |
| <b>GaussianWild</b>  | 21.30 | 0.771 | 0.167 | 22.33       | 0.892 | 0.115 | 20.72 | 0.752 | 0.163 |
| <b>NeRF-OSR</b>      | 19.38 | 0.552 | 0.535 | 21.47       | 0.789 | 0.378 | 19.71 | 0.595 | 0.413 |
| <b>NeRF-W</b>        | 19.62 | 0.602 | 0.460 | 20.49       | 0.825 | 0.339 | 17.42 | 0.619 | 0.409 |

Table 2. **Extended quantitative results (Part 2)** on City2, Industrial2, and City. Metrics are reported separately for PSNR, SSIM, and LPIPS.



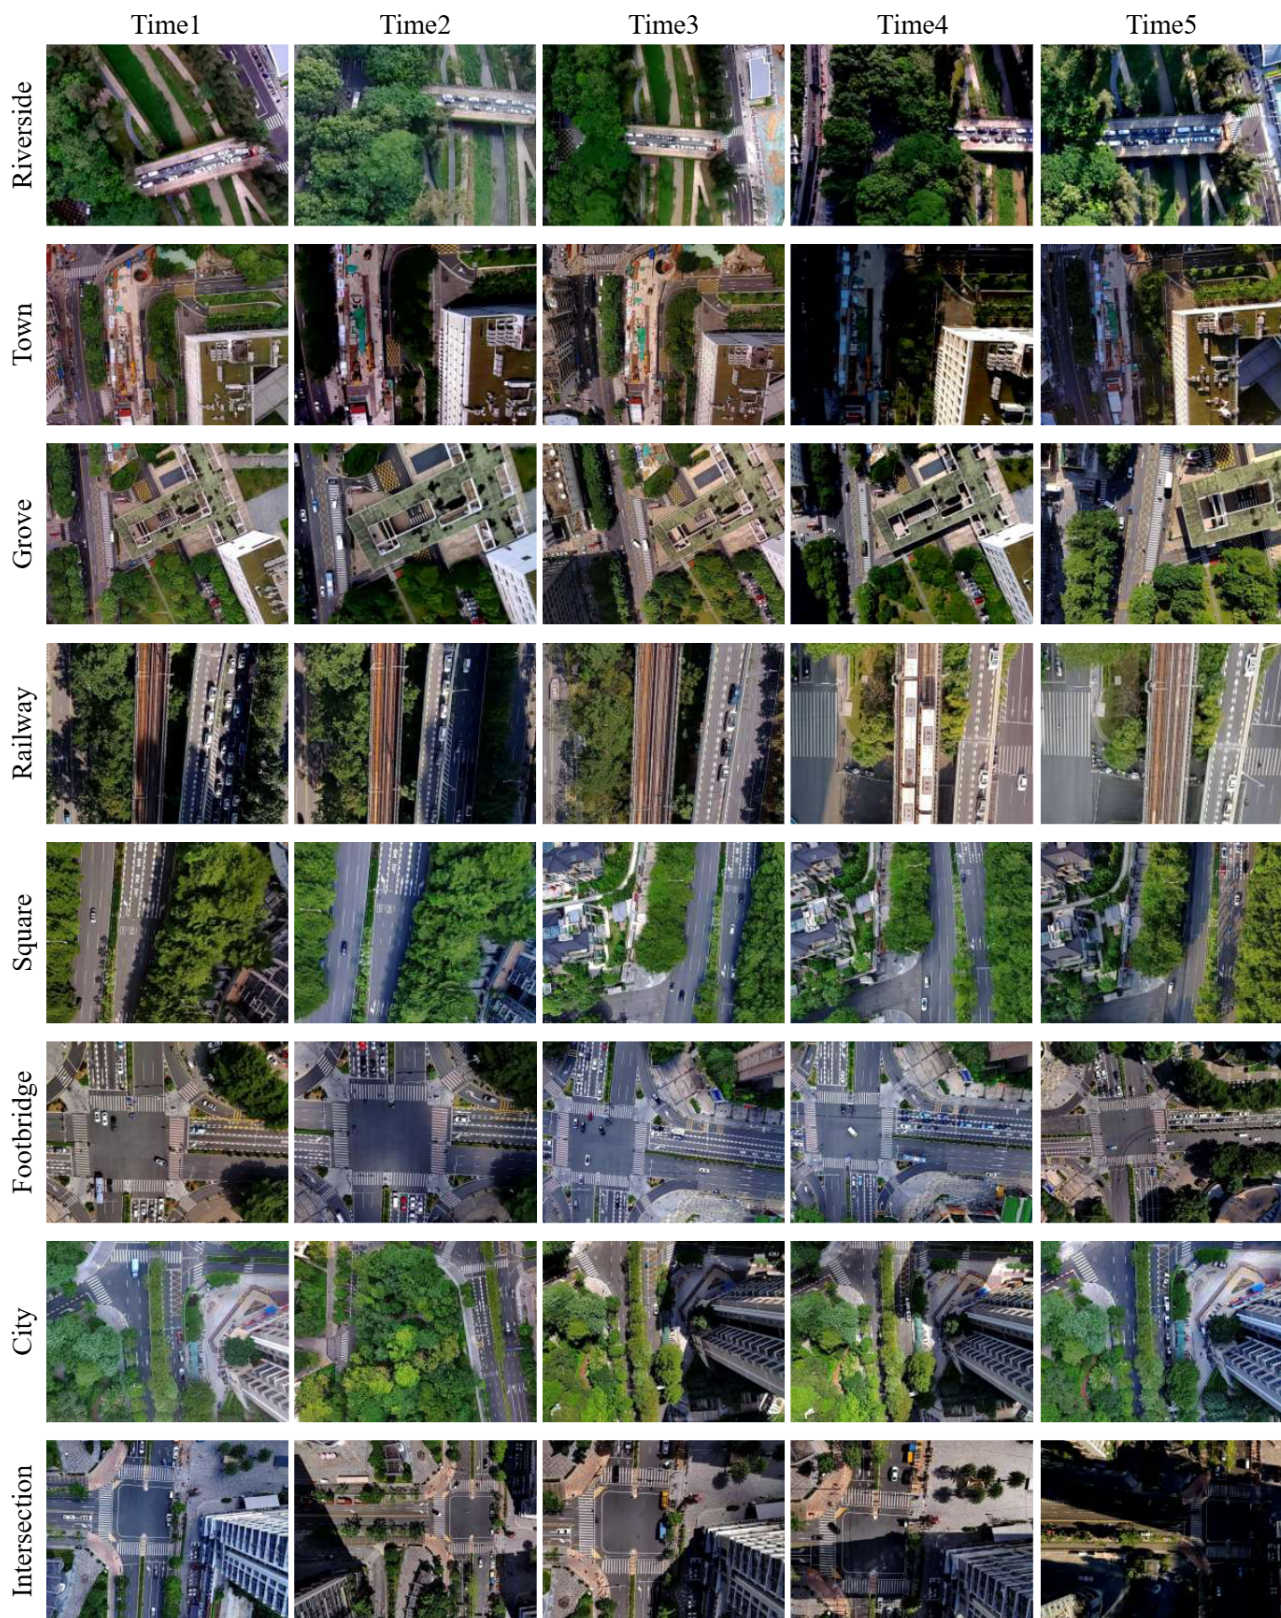

Figure 3. **Representative multi-time-slot visualizations (Part I).** Each scene is shown under 3–5 time slots captured along identical waypointed UAV trajectories. Shadow displacement, shading gradients, and ambient-light variations illustrate the natural illumination diversity captured by UAVLight.







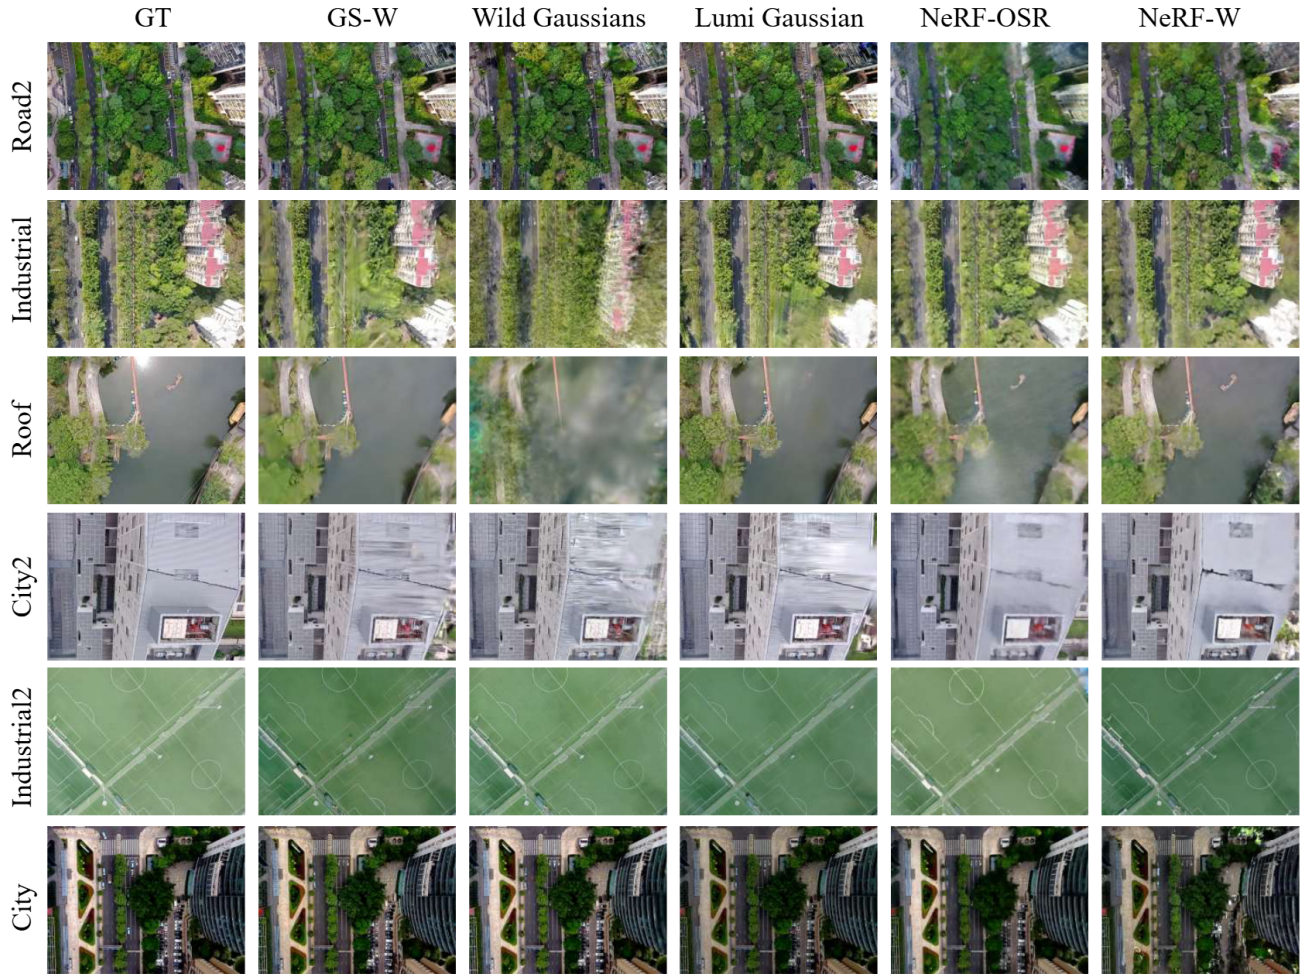

Figure 5. **Additional comparisons on the remaining six scenes.** We present the rendering results from all baselines, complementing the main paper and providing full-scene coverage of implicit and explicit illumination models across UAVLight.
